# Supplementary material for: Upconversion Luminescence Response of a Single YVO4:Yb, Er Particle
Source: MDPI journal article supplement (doi:10.3390/mi14051075), 2023-05-19
Supplement: s1 [file s1]

# Upconversion luminescence response of a single YVO<sub>4</sub>:Yb, Er particle

D.K. Zharkov, A.V. Leontyev, A.G. Shmelev, L.A. Nurtdinova, A.P. Chuklanov, N.I. Nurgazizov, V.G. Nikiforov\*

Zavoisky Physical-Technical Institute, FRC Kazan Scientific Center of RAS, Sibirsky tract, 10/7, 420029, Kazan, Russia

\* E-mail address: [vgnik@mail.ru](mailto:vgnik@mail.ru)

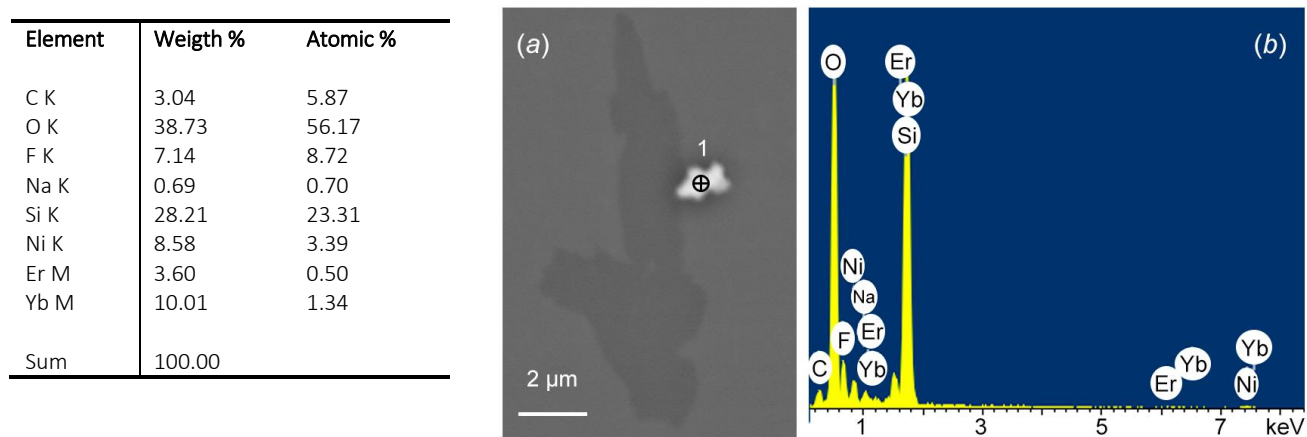

**Fig. S1.** SEM image (a) and EDS spectrum (b) of the YVO<sub>4</sub>:Yb, Er SP.

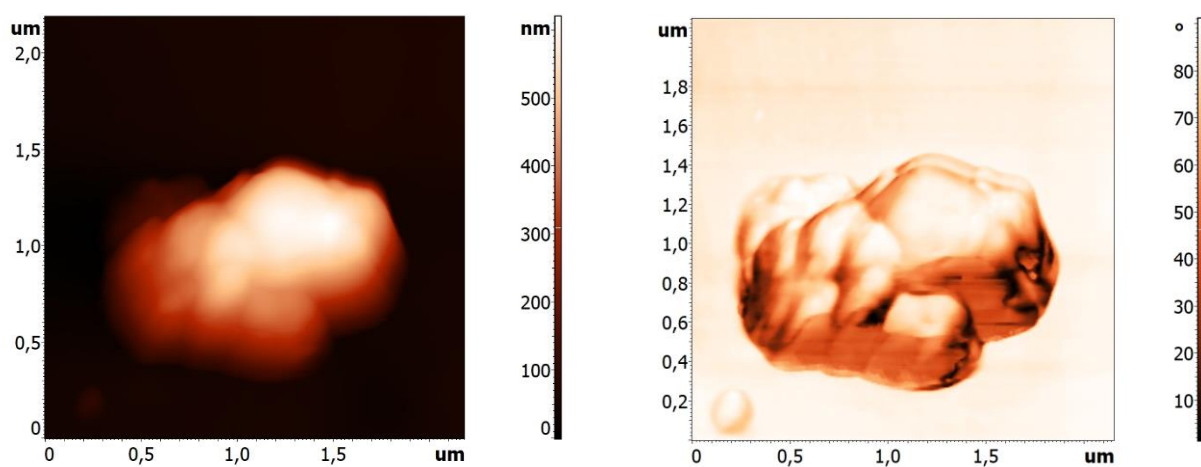

**Fig. S2.** AFM image (left) and phase-contrast image (right) of the YVO<sub>4</sub>:Yb, Er SP.

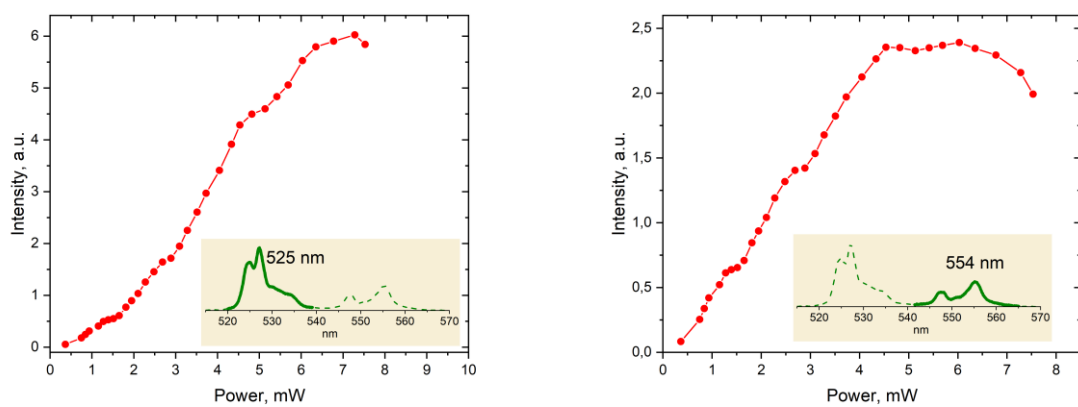

**Fig. S3.** Dependences of the integral intensities of  $\text{Er}^{3+}$  luminescence in the 520-540 nm (left panel) and 540-565 nm (right panel) ranges on the laser power for  $\text{YVO}_4: \text{Yb, Er SP}$ . Despite the Fig. 7, plots are presented in linear-linear format.
